# Supplementary material for: A 2D/3D Nanoplatform for Electrochemical Diagnosis of miRNA-122 in Breast Cancer Cell Lines
Source: Research Square preprint supplement (doi:10.21203/rs.3.rs-7449624/v1), 2025-09-10
Supplement: Supplementary file 1 [file 4c5e4155cb84ac6faa794024.docx]

**A 2D/3D Nanoplatform for Electrochemical Diagnosis of miRNA-122 in Breast Cancer Cell Lines**

Ali Esmaeilian a, b, Nastaran Arab b, Fatemeh Yazdian *c, Morteza Hosseini *b, Seyed Mohammad Reza Mortazavi b, Mohammad Reza Ganjali d

*a Department of Life Science Engineering, Alborz Campus, University of Tehran, Tehran, Iran*

*b Nanobiosensors Lab, Department of Life Science Engineering, Faculty of New Sciences & Technologies, University of Tehran, Tehran, Iran*

*c Department of Life Science Engineering, Faculty of New Science and Technologies, University of Tehran, Tehran, Iran*

*d Center of Excellence in Electrochemistry, School of Chemistry, College of Science, University of Tehran, Tehran, Iran*

* Correspondence: Fatemeh Yazdian; Morteza Hosseini

E-mail address: [yazdian@ut.ac.ir](mailto:yazdian@ut.ac.ir)

E-mail address: [Hosseini_m@ut.ac.ir](mailto:Hosseini_m@ut.ac.ir)

**Table S1** Oligonucleotide sequences

| Oligonucleotide name | Sequence |
| --- | --- |
| DNA capture probe (CP) | 5՛-SH-(CH)6-CAAACACCATTGTCACACTCCA-3՛ |
| DNA detect probe (DP) (miRNA-122) | 5՛-TGGAGTGTGACAATGGTGTTTG-3՛ |
| miRNA-103 | 5՛-AGCAGCAUUGUACAGGGCUAUGA-3՛ |
| miRNA-21 | 5՛-UAGCUUAUCAGACUGAUGUUGA-3՛ |
| miRNA-191 | 5՛-CAACGGAATCCCAAAAGCAGCTG-3՛ |
| miRNA-141 | 5՛-GGTAGAAATGGTCTGTCACAT-3՛ |
| Single-mismatched miRNA (SM) | 5՛-TGGAATGTGACAATGGTGTTTG-3՛ |
| Three-mismatched (TM) | 5՛-TCGAATGTGACAATTGTGTTTG-3՛ |

**
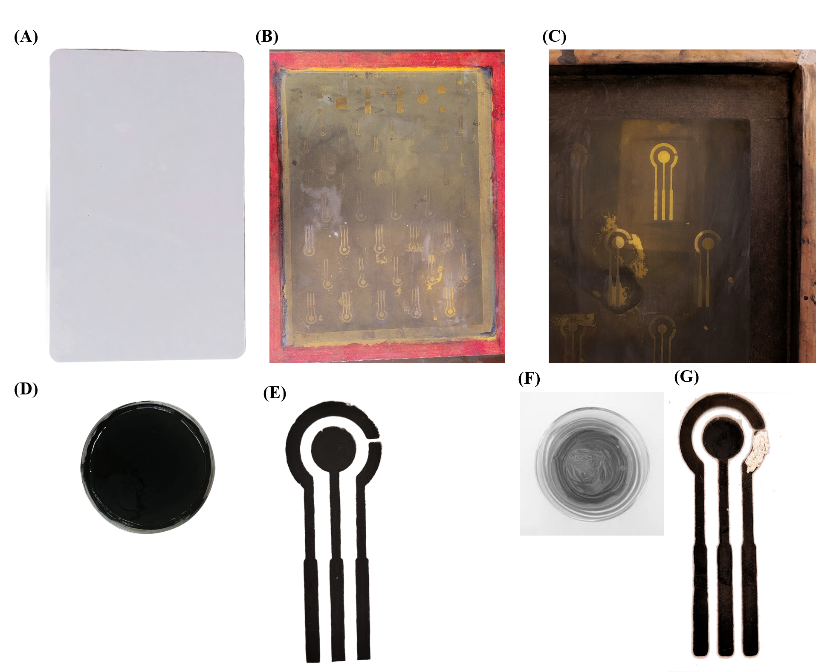
**

**Fig. S1**. (A) PVC card, (B) and (C) Stencil tool, (D) Carbon ink, (E) Screen-printed biosensor without silver adhesive and reference electrode, (F) Sliver ink, (G) Screen-printed biosensor

**
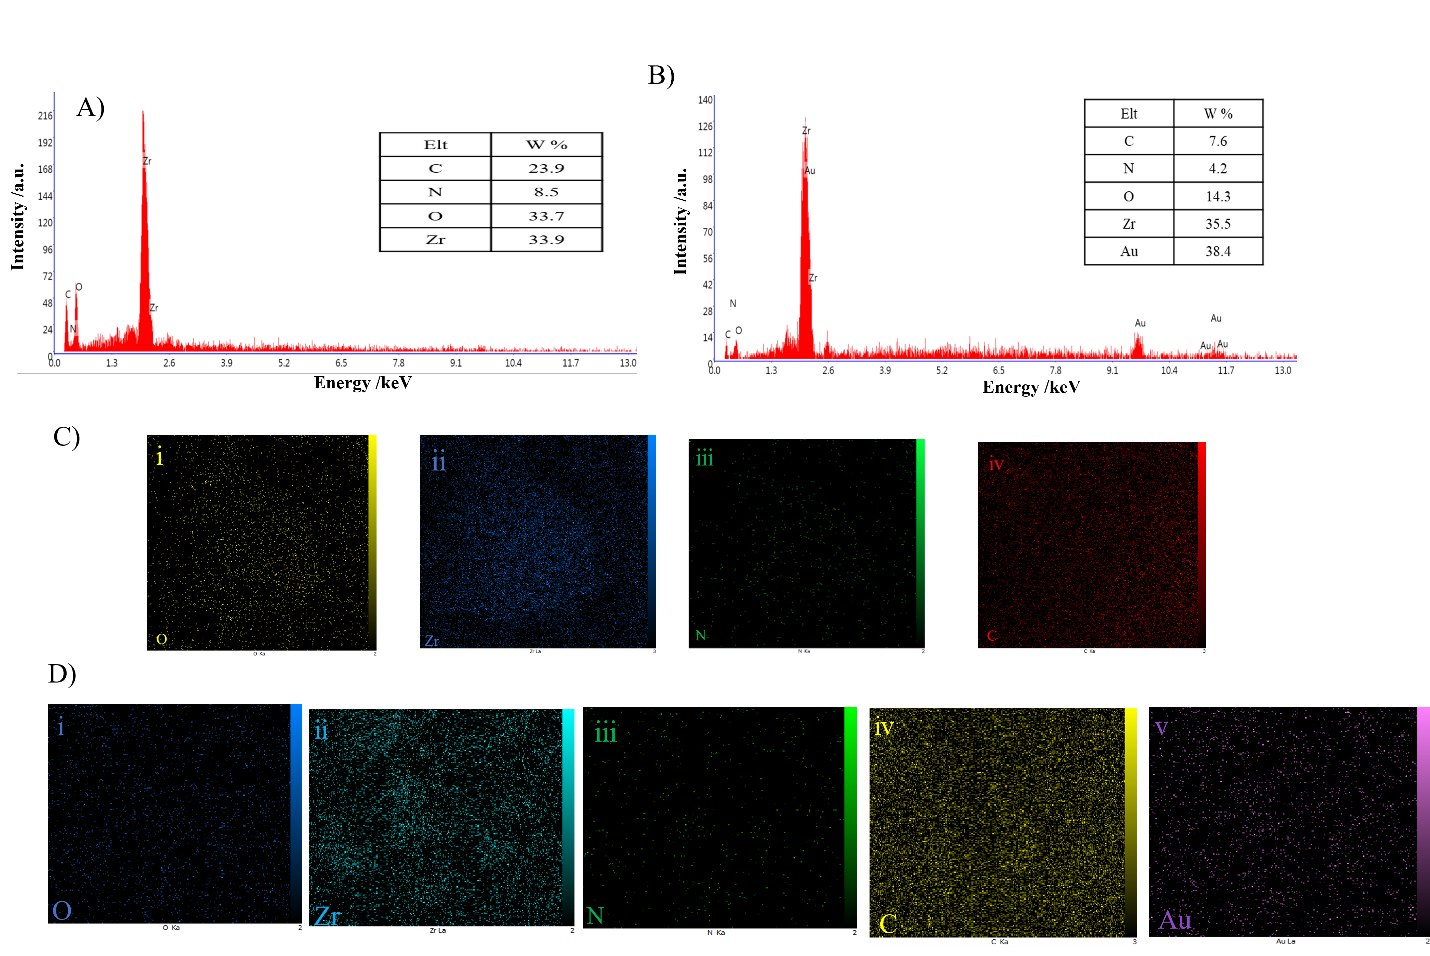
**

**Fig. S2**. (A) EDX of UiO-66-NH2. (B) EDX of Au@UiO-66-NH2. (C) UiO-66-NH2’s elemental maps. (D) Au@UiO-66-NH2’s elemental maps


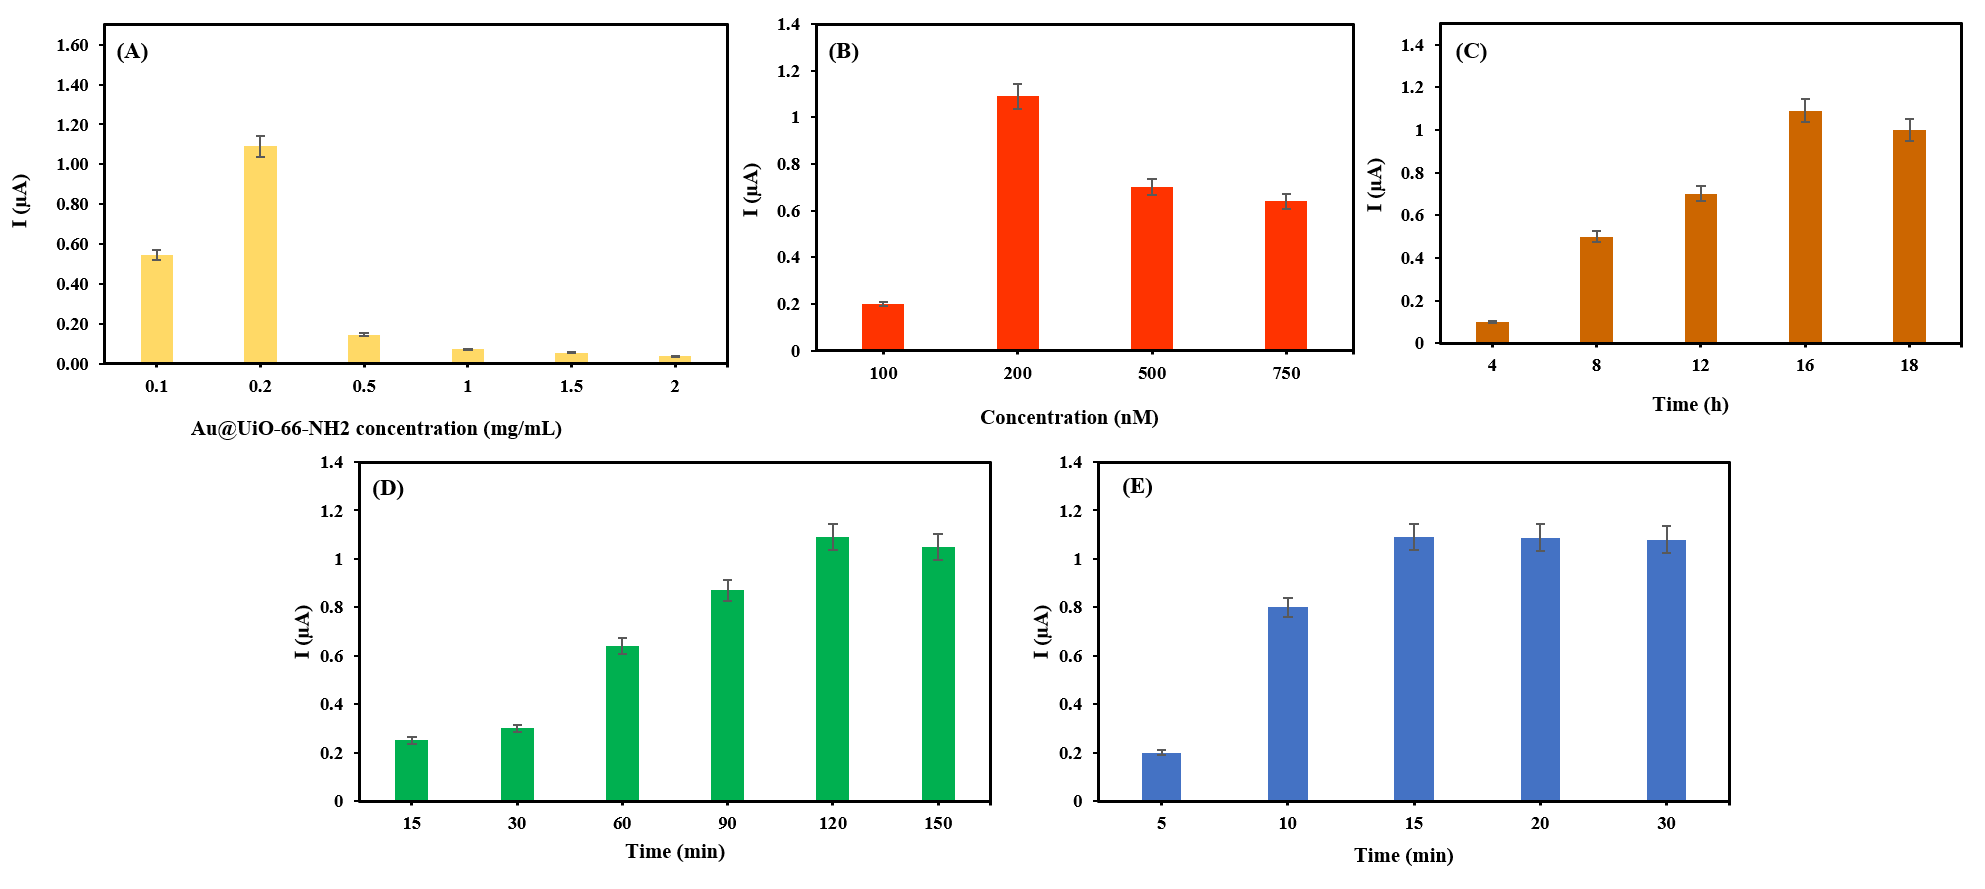


**Fig. S3**. Optimization of key parameters for the electrochemical biosensor. (A) Optimization of Au@UiO-66-NH2 concentration, (B) Optimization of probe concentration, (C) Optimization of probe immobilization time, (D) Optimization of hybridization time between capture and miRNA-122 (E) Optimization of methylene blue incubation time. (DPV respond of biosensor between -1.5 to 1 and scan rate was 300 mV/s in 0.2 M PBS solution, n=3)

**Table S2** assesses the performance of the developed biosensor for miRNA-122 detection in comparison with previously reported biosensors.

| **Biosensing mechanism** | **Nanomaterial** | **LOD** | **Linear range** | **Ref.** |
| --- | --- | --- | --- | --- |
| CP/MB/TCEP | Au | 0.1 fM | 0.1 fM- 0.5 nM | [1] |
| CP/GO/PB | GO/PB | 1.5 fM | 10 fM- 10 nM | [2] |
| CP/MB | rGO/Au | 1.73 pM | 10 pM- 10 µM | [3] |
| CP/ P19 protein | AuNPs | - | 10 aM- 1µM | [4] |
| Label-free | GRP | 1.06 pM | - | [5] |
| CP/MB | AuHFGNs / PnBA-MXene | 0.003 aM | 0.01 aM- 10 nM | [6] |
| TDN /HCR / HRP enzyme | AuNPs | 0.74 aM | - | [7] |
| CP/MB/Endonuclease-assisted | AuNPs/ PDDA | 30 aM | 100 aM-1 nM | [8] |
| CP/MB | Au@NH2-UiO-66/ MXene | 503fM | 1 pM - 0.75 µM | This study |

CP: Capture probe, MB:Methylene Blue, TCEP: tris(2-carboxyethyl) phosphine hydrochloride, GO: Graphene Oxide, PB: Prussian blue, rGO: Reduced graphene oxide, AuNPs: Gold nanoparticales, GRP: Graphene, AuHFGNs: Hierarchical flower-like gold, PnBA: poly (n-butyl), TDN: Tetrahedral DNA nanostructure, PDDA: diallyldimethylammonium chloride


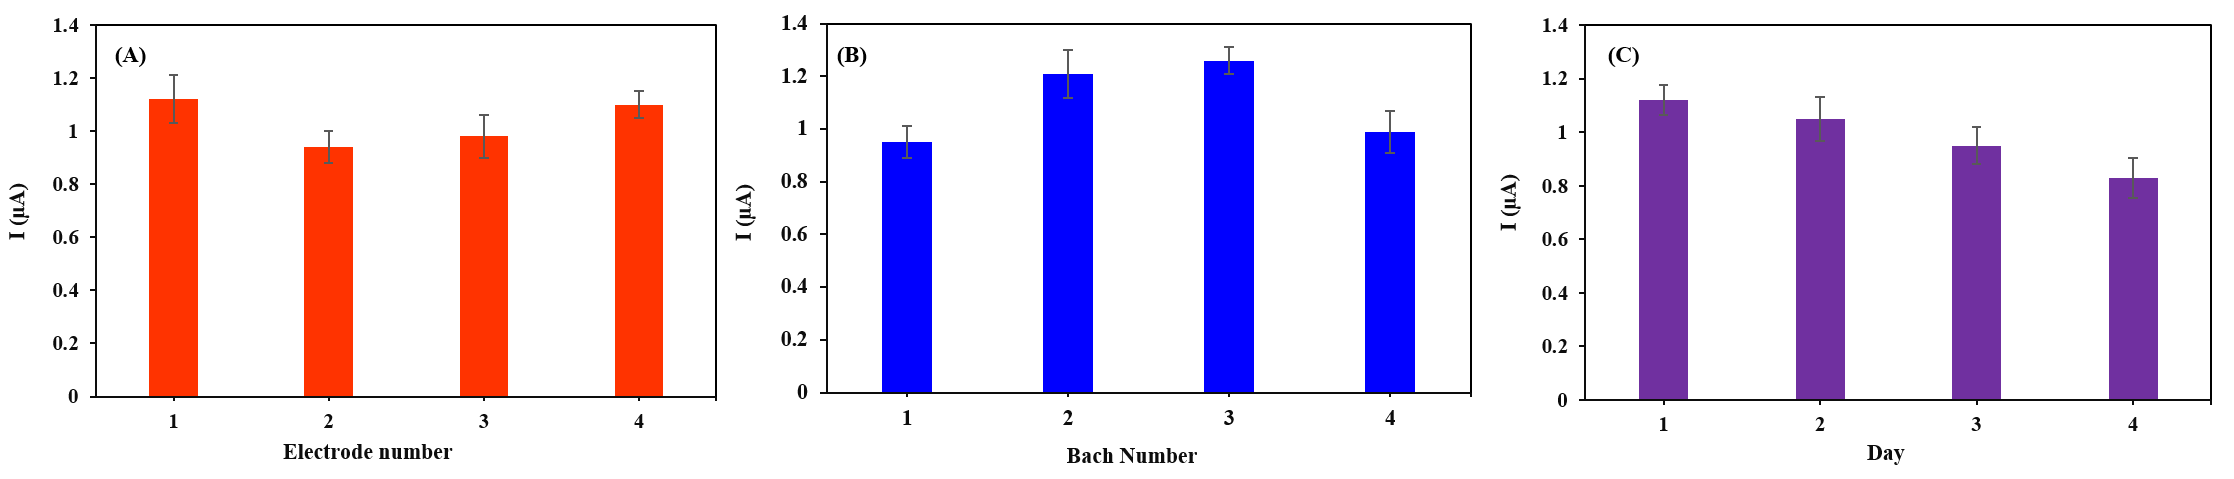


**Fig. S4**. (A) Biosensor repeatability with 2 measures in different concentrations of 1 pM, 1 nM (B) Biosensor reproducibility with 4 autonomous electrodes, (C) stability of biosensor after strong 14 days. (n=3).

**Reference**

1. Wang T, Viennois E, Merlin D, Wang G (2015) Microelectrode miRNA sensors enabled by enzymeless electrochemical signal amplification. Analytical chemistry 87 (16):8173–8180

2. Wang F, Chu Y, Ai Y, Chen L, Gao F (2019) Graphene oxide with in-situ grown Prussian Blue as an electrochemical probe for microRNA-122. Microchimica Acta 186:1–9

3. Kasturi S, Eom Y, Torati SR, Kim C (2021) Highly sensitive electrochemical biosensor based on naturally reduced rGO/Au nanocomposite for the detection of miRNA-122 biomarker. Journal of Industrial and Engineering Chemistry 93:186–195

4. Labib M, Khan N, Ghobadloo SM, Cheng J, Pezacki JP, Berezovski MV (2013) Three-mode electrochemical sensing of ultralow microRNA levels. Journal of the American Chemical Society 135 (8):3027–3038

5. Kilic T, Kaplan M, Demiroglu S, Erdem A, Ozsoz M (2016) Label-free electrochemical detection of microRNA-122 in real samples by graphene modified disposable electrodes. Journal of The Electrochemical Society 163 (6):B227

6. Ranjbari S, Rezayi M, Arefinia R, Aghaee-Bakhtiari SH, Hatamluyi B, Pasdar A (2023) A novel electrochemical biosensor based on signal amplification of Au HFGNs/PnBA-MXene nanocomposite for the detection of miRNA-122 as a biomarker of breast cancer. Talanta 255:124247

7. Shen D, Hu W, He Q, Yang H, Cui X, Zhao S (2021) A highly sensitive electrochemical biosensor for microRNA122 detection based on a target-induced DNA nanostructure. Analytical Methods 13 (25):2823–2829

8. Miao P, Wang B, Yu Z, Zhao J, Tang Y (2015) Ultrasensitive electrochemical detection of microRNA with star trigon structure and endonuclease mediated signal amplification. Biosensors and Bioelectronics 63:365–370
